## CORRECTION

# Correction: Evaluating modified diets and dietary supplement therapies for reducing muscle lipid accumulation and improving muscle function in neurofibromatosis type 1 (NF1)

The *PLOS ONE* Staff

## Notice of republication

This article was republished on October 5, 2020, to include a Publisher's Note. The Publisher's Note was added to clarify that the article is a pre-registered research article and to provide information about the assessment process administered by Children's Tumor Foundation (CTF) and *PLOS ONE*. Please download the article again to view the correct version. The originally published, uncorrected article and the republished, corrected article are provided here for reference.

## Supporting information

**S1 File. Originally published, uncorrected article.**  
(PDF)

**S2 File. Republished corrected article.**  
(PDF)

## Reference

1. Vasiljevski ER, Houweling PJ, Rupasinghe T, Kaur T, Summers MA, Roessner U, et al. (2020) Evaluating modified diets and dietary supplement therapies for reducing muscle lipid accumulation and improving muscle function in neurofibromatosis type 1 (NF1). *PLoS ONE* 15(8): e0237097. <https://doi.org/10.1371/journal.pone.0237097> PMID: 32810864

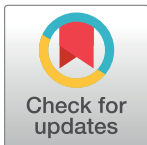

## OPEN ACCESS

**Citation:** The *PLOS ONE* Staff (2021) Correction: Evaluating modified diets and dietary supplement therapies for reducing muscle lipid accumulation and improving muscle function in neurofibromatosis type 1 (NF1). *PLoS ONE* 16(3): e0249380. <https://doi.org/10.1371/journal.pone.0249380>

**Published:** March 24, 2021

**Copyright:** © 2021 The PLOS ONE Staff. This is an open access article distributed under the terms of the [Creative Commons Attribution License](https://creativecommons.org/licenses/by/4.0/), which permits unrestricted use, distribution, and reproduction in any medium, provided the original author and source are credited.
